# Supplementary material for: Fabrication and enhanced photocatalytic activity of inorganic core–shell nanofibers produced by coaxial electrospinning
Source: Royal Society of Chemistry journal article supplement (doi:10.1039/c2sc00436d), 2012-01-01
Supplement: c2sc00436d.pdf [file c2sc00436d.pdf]

**Supplementary information for**

**“Fabrication and Enhanced Photocatalytic Activity of Inorganic Core-shell Nanofibers  
Produced by Coaxial Electrospinning”**

Xiaohui Peng<sup>1</sup>, Alexander C. Santulli<sup>1</sup>, Eli Sutter<sup>2</sup>, and Stanislaus S. Wong<sup>1,3,\*</sup>

\*To whom correspondence should be addressed. Phone: 631-032-1703 / 631-344-3178

Email: [sswong@notes.cc.sunysb.edu](mailto:sswong@notes.cc.sunysb.edu); [sswong@bnl.gov](mailto:sswong@bnl.gov)

<sup>1</sup>Department of Chemistry; State University of New York at Stony Brook;

Stony Brook, NY 11794-3400

<sup>2</sup>Center for Functional Nanomaterials,

Brookhaven National Laboratory; Building 735; Upton, NY 11973

<sup>3</sup>Condensed Matter Physics and Materials Sciences Department,

Brookhaven National Laboratory; Building 480; Upton, NY 11973

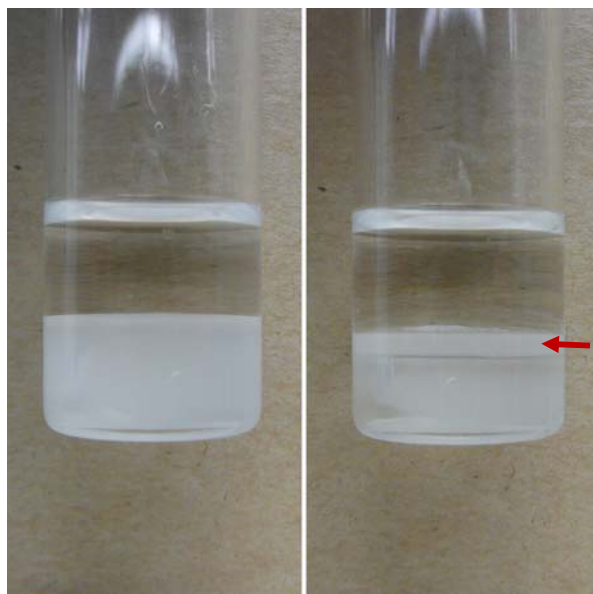

**Figure S1.** (Left) Photograph of ethanol (upper layer) and a mixture of tin 2-ethylhexanoate and mineral oil (bottom layer). (Right) Photograph of the identical solution after one hour. An intermediate layer has clearly formed between the ethanol and mineral oil layers (as indicated by the red arrow).

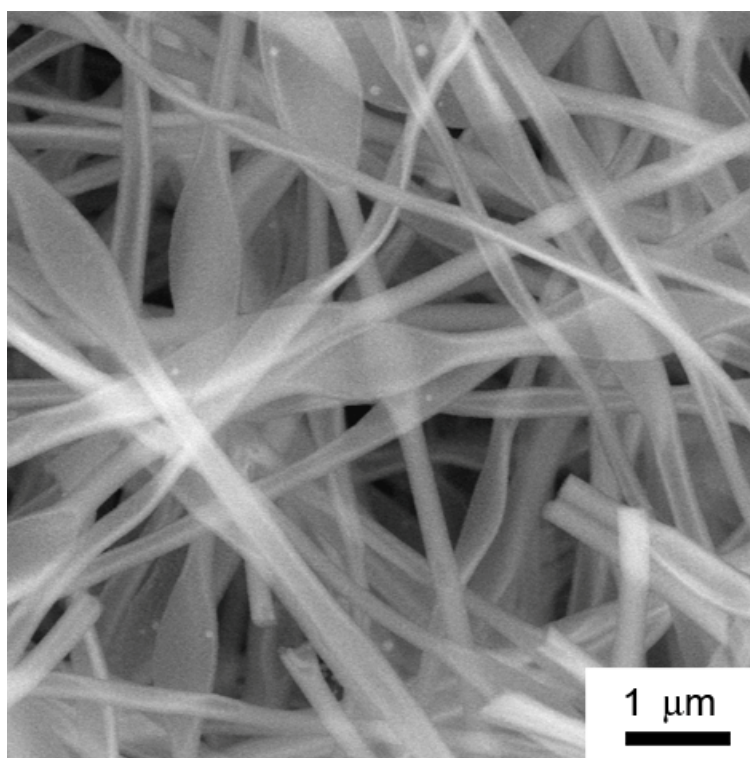

**Figure S2.** SEM image of SnO<sub>2</sub>/TiO<sub>2</sub> nanofibers when the concentration of tin (II) precursor is 0.8 mmol/mL.
